# 1 Predicting Hypertension Among HIV Patients on Antiretroviral Therapy in Rural Eastern Cape, 2 South Africa Using Machine Learning

3 Urgent Tsuru<sup>1,\*</sup>, Trymore Ncube<sup>4</sup>, Kelechi E. Oladimeji<sup>3</sup> and Teke R. Apalata<sup>2</sup>

4 <sup>1</sup> Department of Public Health, Faculty of Health Sciences, Walter Sisulu University, Mthatha, 5100, Eastern Cape, South Africa;  
5 [tsurourgent@gmail.com](mailto:tsurourgent@gmail.com)

6 <sup>2</sup> Department (s) of Laboratory Medicine and Pathology, Faculty of Health Sciences, Walter Sisulu University, Mthatha, 5100, Eastern Cape, South  
7 Africa; [tapalata@wsu.ac.za](mailto:tapalata@wsu.ac.za)

8 <sup>3</sup> Ezintsha, Faculty of Health Sciences, University of the Witwatersrand, Johannesburg, South Africa; [oladimejikelechi@yahoo.com](mailto:oladimejikelechi@yahoo.com)

9 <sup>4</sup> Department of Information and Communication Technologies Services (ICTS), Durban University of Technology; [trymorencube@yahoo.com](mailto:trymorencube@yahoo.com)

10 \* Correspondence: [tsurourgent@gmail.com](mailto:tsurourgent@gmail.com)

## 11 Abstract

12 **Background:** Hypertension continues to be a major challenge in developing countries like South Africa,  
13 as it significantly contributes to the cardiovascular disease burden in these countries. This study aimed to  
14 utilize the machine learning (ML) models to anticipate the incidence of hypertension in HIV patients  
15 under antiretroviral therapy (ART) in rural Eastern Cape, South Africa.

16 **Methods:** This research carried out a retrospective cohort study and created and tested six machine  
17 learning algorithms: Neural Networks, Random Forest, Logistic Regression, Naive Bayes, K-Nearest  
18 Neighbours and XGBoost. The goal was to predict the likelihood of developing hypertension. Feature  
19 selection was done using the Boruta method and the model was assessed using several metrics including  
20 aiming, precision, recall, F1 score, and area under the receiver operating characteristic curve (AUC).

21 **Results:** XGBoost outperformed all other models with an AUC of 0.96, which further suggests it can  
22 effectively distinguish between hypertensives and normotensives. In the case of Boruta analysis, some  
23 aggravated risk factors were age category, time on ART, BMI category, waist to hip ratio, waist size,  
24 family history of HBP and relationship status, physical activity, LDL cholesterol level, awareness of  
25 high blood pressure, education level, use of ART and diabetes mellitus.

26 **Conclusions:** This study has highlighted the utility of XGBoost, as one of the advanced machine  
27 learning algorithms, in reliably forecasting the occurrence of hypertension in HIV ART patients in a  
28 rural setting. The established risk factors elucidate the complexity behind the hypertension emergence  
29 and hence the need for triad approaches which include lifestyle changes, clinical treatments, and  
30 demographic solutions to tackle the public health problem.

## 31 **Introduction**

32 Hypertension (HTN) is a global challenge, which is claiming approximately eight and half  
33 million individuals annually. Most of these deaths (88%) occur in low and middle-income countries  
34 (LMICs) [1]. Hypertension is also implicated in causing most cardiovascular disease (CVD) cases,  
35 particularly in South Africa where HTN prevalence is increasing at an alarming rate [1]. The increase in  
36 the prevalence of HTN is a result of different risk factors such as sedentary lifestyle and diet due to  
37 urbanization in South African societies [2]. Over the past thirty years South Africa also has shown a  
38 limited ability to detect, manage as well as treatment of HTN [3].

39 South Africa has low level of public awareness, health promotion and inadequate screening  
40 practices, which results in a significantly high percentage of undiagnosed HTN cases. Considering South  
41 Africa's low level of public health awareness regarding HTN, the country's HTN burden increases as  
42 untreated HTN can lead to severe health complications, such as stroke, kidney failure, heart failure,  
43 coronary artery disease, and premature mortality [4]. Nevertheless, it is crucial to note that these adverse  
44 outcomes are largely preventable through cost-effective and accessible treatments and interventions [5].

45 The high HTN incidence in South Africa is due to several factors such as limited health literacy,  
46 physical inactivity, unhealthy dietary habits, smoking, inadequate access to healthcare services, and the  
47 financial situation [2]. South Africa endures a dearth in reliable HTN research as most research often  
48 suffer from unbalanced samples, small sample sizes, and inconsistent methodologies for measuring risk  
49 factors. Furthermore, factors such as obesity, prolonged Human Immunodeficiency Virus (HIV)  
50 infection, diabetes, and aging are independently associated with an increased risk of developing HTN  
51 [6].

52 Hypertension affects people from all walks of life for a variety of reasons. Males often develop  
53 HTN at an earlier age than females [7]. According to Li (8), HTN is more common in older people, as  
54 they discovered that age is a crucial factor in HTN, with prevalence rates significantly increasing beyond  
55 the age of 45 [8]. According to Madela and Harriman (9), education level is a significant predictor of  
56 HTN, with lower levels related with higher HTN prevalence and higher levels with better health  
57 outcomes. Furthermore, unemployed people have higher stress levels and less access to healthcare than  
58 employed people [10], and Ramezankhani (11) found that married people have less HTN development  
59 than single, divorced, or widowed people, who are more vulnerable due to social isolation and stress.

60 Dietary habits have a substantial impact on HTN risk, with high salt intake being a well-  
61 established risk factor [12], and smoking has been linked to blood vessel damage, which raises the  
62 likelihood of developing HTN and thereby boosting CVD risks [13]. Furthermore, excessive alcohol  
63 consumption raises the incidence of HTN, although moderate consumption may have preventive effects  
64 [14]. Individuals who engage in regular physical activity, on the other hand, are less likely to develop  
65 HTN than those who lead sedentary lifestyles [15]. Anthropometric parameters such as Body Mass  
66 Index (BMI), which is classified as overweight or obese, are powerful predictors of HTN [16], and  
67 increasing waist circumference and waist-to-hip ratio are substantially related with increased HTN risk  
68 [17].

69 Medical conditions such as diabetes mellitus (DM) significantly increase HTN risk due to their  
70 impact on vascular health and metabolic function [18], alongside elevated glucose levels [19]. A family  
71 history of HTN also increases the risk of an individual to develop HTN [20]. Elevated cholesterol levels  
72 Low-Density Lipoprotein (LDL) cholesterol, specifically total cholesterol, triglycerides, and low High-  
73 Density Lipoprotein (HDL) cholesterol are major risk factors associated with the development of HTN  
74 [21]. Lower Estimated Glomerular Filtration Rate (eGFR) is associated with higher HTN risk as it  
75 signifies reduced kidney function [22]. Finally, chronic inflammation and metabolic changes associated  
76 with both HIV infection and antiretroviral therapy (ART) among people living with HIV (PLHIV),  
77 especially those on ART for longer duration correlates with increased HTN risk [6].

78 Risk assessment models are reported as being effective in identifying and classifying patients  
79 based on their risk factors, this facilitates the commencement of preventive methods. Notable examples  
80 include the Framingham Risk Score for predicting coronary heart disease [23] and the American College  
81 of Cardiology (ACC) / American Heart Association (AHA) Pooled Cohort Equations Risk Calculator  
82 [24]. However, these models often suffer from insufficient ethnic diversity, population  
83 representativeness, and limited reliability [25]. Hence, there is a persuasive need for developing risk  
84 prediction models specifically tailored to the rural populations in South Africa.

85 In terms of developing risk stratification tools for diagnosing HTN, machine learning (ML)  
86 techniques have recently proven to be superior to classic statistical methods [26]. Machine learning  
87 enables systems to learn and handle big datasets with complex interactions [27]. Machine learning also  
88 excels in estimating causal effects in observational research, while not being traditionally based on  
89 causal inference like statistical approaches [28]. Machine learning frequently outperforms traditional

90 statistical methods by eliminating bias, automatically managing missing variables with minimal data  
91 manipulation, correcting for confounding factors, and balancing datasets, resulting in better outcomes  
92 [29]. Furthermore, ML algorithms excel at analysing large amounts of data, where traditional statistical  
93 methods may fall short [30], and provide precise measurements [31]. Therefore, ML techniques can be  
94 useful in developing automated tools for disease prediction, decision support, and assessing HTN risk  
95 within a population [32].

96 A recent review highlighted ML approaches for detecting HTN and noted lack of studies that  
97 combine sociodemographic and clinical data with signal processing for enhancing model performance  
98 [29, 33]. One study employed ML algorithms to group HTN cases based on personal characteristics but  
99 did not consider sociodemographic data [34]. In South Africa, another study applied ML to DM and  
100 HTN risk stratification algorithms for 2,278 patients' data captured by the community health workers  
101 [35]. Furthermore, ML methods employed for detecting HTN from electronic health records were also  
102 undertaken in South Africa [36]. However, while there is progress in ML models for individual disease  
103 risk prediction, there is no research that has been carried out predicting HTN risk factors among PLHIV  
104 in the rural Eastern Cape (EC), South Africa employing ML models.

105 The goal of this study was to create and compare a variety of prediction models for hypertension  
106 using different machine learning and statistical approaches in order to determine the most accurate  
107 model. In this case, the study aims at selecting the best model for real world use, while also determining  
108 the important factors related to PLHIV in rural EC, South Africa to improve insight against hypertension  
109 risk factors, hence the gaps in the study that is currently available.

## 110 **Methods**

### 111 **Ethical Approval**

112 This study was in line with the ethical guidelines as declared by Helsinki (37) and approval was  
113 obtained from Walter Sisulu University ethics committee, protocol number (048/ 2019) and the EC  
114 department of Health (EC\_201907\_020). Before completing a written informed consent, potential  
115 participants were issued with an information sheet in English and their vernacular. The information  
116 sheet contained the process of research, the rights of the participants, as well as the contact person's  
117 information.

## 118 **Study Setting and Population**

119 This study was conducted in the rural EC province of South Africa, which is an area heavily  
120 burdened by HIV. Thus, it was important to the effects of HIV and its treatment in this population  
121 hence, highlighting the intersection of healthcare limitations and chronic disease burdens.

122 The study population consisted of PLHIV who were on Highly Active Antiretroviral Therapy  
123 (HAART) and receiving medical care in healthcare facilities throughout rural EC. The current study  
124 involved PLHIV that were at least 18 years of age, which is ideal in capturing the sexually active age  
125 group [38]. To ascertain that the effect of HAART on hypertension in PLHIV is completely catered for,  
126 the participants were supposed to have been on HAART for at least 12 months. Also, as part of  
127 eligibility criteria, patients were expected to fulfil all the clinical requirements, including an in-depth  
128 history check, blood pressure assessment, and any other clinical history as deemed essential to guarantee  
129 reliable results and thorough analysis.

130 We determined precise criteria for inclusion and exclusion to enhance the concentration of the  
131 research. Participants comprised adult PLHIV patients who had initiated HAART for at least one year  
132 and had thorough clinical information. We did not include patients who had a history of HTN during  
133 active HAART. This was to avoid other factors that would interfere with the clarity of the treatment of  
134 HIV relations history with HTN. Patients who lack vital clinical information or have inadequate medical  
135 history records were also excluded to complement the aim of the study to enhance only robust and  
136 comprehensive datasets for prediction modeling and analysis.

## 137 **Study Design**

138 A retrospective cohort study using ML techniques to model the predictors of incidence of HTN  
139 using data collected from selected health facilities in rural EC, South Africa.

## 140 **Data Analysis**

141 As part of data analysis, numeric data were noted as mean  $\pm$  standard deviation (SD) and for all  
142 categorical variable frequency and percentage were recorded. To assess the differences between  
143 hypertensive and normotensive groups, a chi-square test was utilised and a p-value  $< 0.05$  was regarded  
144 as statistically significant.

145 We then investigated the six most used supervised ML models to measure their predictive  
146 effectiveness in diagnosing HTN. In this study, the development of HTN was considered as a target  
147 feature while the other features were considered as independent variables. Feature selection was  
148 performed using the Boruta based feature selection [39]. Following model training, we measured the  
149 accuracy, precision, recall, F1 and area under the curve (AUC). The higher accuracy and precision  
150 suggested comparatively better models. In addition, we conducted feature ranking, which highlighted  
151 factors that mostly contributed to the development of HTN. Model building and data analyses were  
152 performed using R studio, utilising packages like caret, ggplot, and tidyverse.

## 153 **Machine learning Models**

154 Six ML models were developed which are, Logistic Regression (LR), Neural Network (NN),  
155 Naïve Bayes (NB), Random Forest (RF), k-Nearest Neighbour (kNN), and Extreme Gradient Boosting  
156 (XGBoost), these ML models were used to predict the development of HTN among PLHIV in rural  
157 Eastern Cape.

### 158 **Logistic Regression**

159 Logistic regression is a fundamental ML model widely used for binary classification tasks. It can  
160 also be extended to handle multi-label classification problems [40]. The technique employs the sigmoid  
161 function to create a regression model that estimates the probability that an input belongs to a specific  
162 category [41]. Logistic regression is a binary classifier that takes one or more features as input and  
163 predicts the corresponding response [42]. It is known for its simplicity and effectiveness in delivering  
164 probabilistic predictions [43]. The logit function can be presented as

165

$$\text{logit}(p_j) = \log_e \frac{p_j}{1 - p_j} = \beta_0 + \beta_1 X_{1j} + \beta_2 X_{2j} + \dots + \beta_k X_{kj} + e_j, j = 1, 2, \dots, n \quad (1)$$

166 Where,  $p_j$  is the probability of developing HTN and  $1 - p_j$  is the probability of not developing  
167 HTN for  $j^{\text{th}}$  individual and  $\beta_k$  is the  $k^{\text{th}}$  regression coefficient [44].

### 168 **Naive Bayes**

169 Naive Bayes is a type of algorithm that belongs to the class of probabilistic types which uses the  
170 Baye's theorem and assumes that there is no relation between the features in the layer [45]. This is a  
171 very basic but still effective classification approach based on Bayes theorem but with very strong

172 independence assumptions [46]. The Naïve Bayes algorithm has a widespread application in many  
173 categories that include sentiment analysis, text classification, and medical diagnosis algorithms that  
174 presume that features are independent within a particular set [47]. Examples of where Naive Bayes has  
175 been used include assigning ratings in the airline business to customer satisfaction [48], text data in  
176 sentiment analysis [49] and military uses in denial-of-service attacks prediction [50].

### 177 **k-Nearest Neighbour**

178 The kNN algorithm is a widely used classification approach in various fields. It relies on the idea  
179 that like objects are located near each other in a feature space, which is evaluated through distance  
180 triangulation [51]. In other words, the method defines the class as the mode of the classes of its k-nearest  
181 vertices, hence it is non-parametric is a learning method as well [52]. The kNN showed a promising  
182 performance in real-world settings and is thus often employed in supervised learning tasks [53].

### 183 **Extreme Gradient Boosting**

184 XGBoost is an ML model which lies under decision tree-based ensemble methods that applies  
185 the Gradient Boosting framework, as explicated by Chen and Guestrin (54). This algorithm increases the  
186 accuracy of prediction models through sequentially applying new models of Decision Tree which  
187 corrects the failures of the previous models otherwise termed as sequential boosting [55,56]. XGBoost is  
188 highly efficient since it was developed for speed and performance, hence its popularity amongst the ML  
189 practitioners [57].

### 190 **Random Forest**

191 Random Forest is an ensemble collection of models based on multiple Decision Trees, whereby  
192 each model can independently make predictions, and the outputs are aggregated through a voting  
193 process, using most of the models' predictions [58]. Using this technique, the RF model can improve its  
194 significantly classification accuracy with quite a high value [59]. The model induces randomness into  
195 the tree construction which improves performance reliability. [60].

### 196 **Artificial Neural Network**

197 Artificial Neural Networks are models that are inspired by the human brain, and they are also  
198 computational [44]. Among the various types of NNs, Multilayer Perceptrons (MLPs) are feedforward  
199 neural networks that consist of numerous layers which are input, output and hidden layers [61]. The  
200 input layer receives signals, the output layer provides classifications or predictions, and there can be  
201 multiple hidden layers in between, serving as the computational engine of the MLP [62]. Non-linear

202 activation functions are typically used in both the hidden and output layers to introduce complexity and  
203 enable the network to learn complex patterns [63].

$$Sigmoid(x) = \frac{1}{1 + e^{-x}} \quad (2)$$

204 Where  $x$  is typically the linear combination of the input features and their corresponding weights, plus a  
205 bias term. Mathematically, it can be expressed as:

$$x = w_1x_1 + w_2x_2 + \dots + w_nx_n + b \quad (3)$$

206 Where  $x_i$  are the input features,  $w_i$  are the weights and  $b$  is the bias.

## 207 Performance Metrics

208 The predictions of the models developed in this study can generate four possible outcomes: True  
209 Positive (TP), True Negative (TN), False Positive (FP) and False Negative (FN). Positive individuals in  
210 our study had HTN, whereas negative patients had normal blood pressure. TP and TN are correct  
211 predictions. FP outcomes are positive predictions when they are negative. On the other hand, FN  
212 outcomes are predictions that are negative when, they are positive. We evaluate the prediction models  
213 with the following performance metrics:

214 **Sensitivity or recall or TP rate:** This metric indicates the proportion of true positives

215 predicted out of all positives in a dataset [64].

$$Recall = \frac{TP}{TP + FN} \quad (4)$$

216 **Specificity or False Negative rate:** This is the number of negative cases that are mistakenly identified  
217 as positive [65].

$$Specificity = \frac{TN}{TN + FP} \quad (5)$$

218 **Accuracy:** This is a metric utilised in determining how many correct predictions a model produced  
219 through the whole test dataset [66].



$$Accuracy = \frac{TP + TN}{TP + TN + FP + FN} \quad (6)$$

220 **Precision:** This indicates the correctness of the correct prediction [67].

$$Precision = \frac{TP}{TP + FP} \quad (7)$$

221 **F1-score:** This metric measures the accuracy of the model based on sensitivity and precision. A higher  
222 F1-score value indicates the model is more accurate [68].

$$F1\ Score = 2 \times \frac{Precision \times Recall}{Precision + Recall} \quad (8)$$

223 **Misclassification rate:** a performance indicator that indicates the proportion of incorrect predictions  
224 without differentiating between positive and negative predictions [69].

$$Misclassification\ rate = 1 - Accuracy \quad (9)$$

225 **Area Under the Receiver Operating Characteristic Curve** is used to assess the model's prediction  
226 accuracy [44]. This statistic assesses the algorithm's ability to distinguish between hypertensive and  
227 normal individuals [70].

$$AUC = \int_{x=0}^1 TPR(FPR^{-1}(x))dx \quad (10)$$

228 In scientific studies the true positive rate (TPR) which can be known as the sensitivity (y-axis) are  
229 plotted against  $1 - specificity$  (x-axis), which the false positive rate (FPR), this plot is known as the  
230 ROC curve. The ROC curve is essential in evaluating the predictive validity of ML-based model  
231 especially in the medical fraternity [44]. The AUC generated by a ROC has values from zero to one.

## 232 **Machine Learning Model Development Process**

233 Fig 1 consists, a structured flowchart illustrating the comprehensive steps involved in the  
234 development of a ML model. This diagram serves as a visual guide through the sequential phases of a

235 typical ML project, highlighting the critical stages and decisions made from data acquisition to the final  
236 evaluation and interpretation of the model.

237

### 238 **Fig 1. Machine Learning model for predicting HTN workflow**

239 The process commences with Data Acquisition, where the necessary data is gathered to form the  
240 foundation of the entire ML process. Exploratory analysis is performed on the data after data  
241 acquisition, followed by pre-processing of the data to identify patterns and anomalies. Data is then split  
242 into, training and testing sets in the ratio 80% and 20% respectively. Splitting the data is important so  
243 that we improve the quality of model output.

244 In the process of developing robust predictive models, it is crucial to ensure that the models  
245 perform well not only on the training data but also on unseen data to avoid overfitting [71]. To achieve  
246 this, the dataset was strategically split into training and testing sets in the ratio 80% to 20%, respectively.  
247 We compared the performance of the ML classifiers using accuracy, precision, recall and F-1 score  
248 respectively.

249 During the Training Phase, the training set is used to train the ML model, adjusting its  
250 parameters to best fit the data. The outcome of this phase is a trained model ready for testing and  
251 evaluation. In the Testing Phase, the trained model is evaluated using the test set to assess its  
252 performance and generalizability. The final step involves Visualizing & Interpreting Results, where the  
253 results are visualized, and the model's performance is interpreted to make informed decisions or  
254 improvements.

255 This flowchart encapsulates the methodical approach in ML model development, providing a  
256 clear roadmap from data handling to obtaining a deployable model. The visualization aids in  
257 understanding the iterative nature of model training and the importance of each step in achieving a  
258 robust ML model.

## 259 **Results**

### 260 **Sociodemographic characteristics of study participants**

261 The results in Table 1 compromise an astute comparison between hypertensive and normotensive  
262 individuals, detailing on numerous lifestyle, demographic, and physiological characteristics. Most  
263 participants (73%) were female, and they had no significant difference in sex distribution between the  
264 normotensive (74%) and hypertensive (71%) groups with a p-value of 0.4. This finding suggests that sex  
265 is not a determinant of HTN prevalence within this cohort.

266 Table 1 also shows that the median age of participants across all the groups was 40 years overall,  
267 of which 39 years in the normotensive group, and 41 years in the hypertensive group, with no significant  
268 difference p-value of 0.8. Nevertheless, when classified into age groups, there was a significant  
269 deviation ( $p < 0.001$ ). The prevalence of HTN increased notably with age, with 64% of hypertensive  
270 PLHIV being over 45 years, compared to only 40% in the normotensive group. This indicates that older  
271 age is associated with a higher risk of HTN.

272 Employment status, though, showed statistical significance with a p-value that is less than 0.001,  
273 with 56% of hypertensive PLHIV reported as unemployed compared to 49% in the normotensive group,  
274 signifying a link between not being employed and chance of developing HTN.

275 Educational achievement seemed balanced generally, having 48% of participants with none or  
276 primary education and 52% in the secondary or higher education group. The highest level of education  
277 of the normotensive and hypertensive groups had a significant difference ( $p < 0.001$ ), suggesting that  
278 education level might had a strong influence on HTN in this sample.

279 Both smoking group ( $p = 0.6$ ) and alcohol ( $p = 0.3$ ) consumption showed no statistical  
280 significance. A total of 235 PLHIV smoked and greater proportion (61%) were hypertensive while 49%  
281 were normotensive. and alcohol consumption at 49% and 53%, respectively ( $p = 0.3$ ). However,  
282 physical exercise differed significantly ( $p = 0.006$ ), with fewer hypertensive individuals (41%) engaging  
283 in regular physical activity compared to normotensive individuals (54%). This highlights the protective  
284 role of physical exercise against HTN.

285 Marital status was statistically significant differences with a p-value that was less than 0.001.  
286 The number of widowed PLHIV was greater for the hypertensive group (38%) compared to the  
287 normotensive group (32%). This might imply that social or emotional factors related to widowhood  
288 could influence HTN. The hypertensive group significantly too much salt (54%) than those who did not

289 have hypertension (33%) and had a p-value < 0.001. This emphasizes the deep-rooted association  
 290 between high salt intake and HTN.

291 Hip circumference (p = 0.4) and Waist circumference (p = 0.5) were found not being statistically  
 292 significant for normotensive and hypertensive groups. Nonetheless, the waist-to-hip ratio was registered  
 293 as significantly greater among the hypertensive PLHIV with a median of 1.23 compared to  
 294 normotensive individuals, with a p-value <0.001. A greater proportion of those that were involved in  
 295 some kind of physical exercise had less chance of developing hypertension (33%). This finding indicates  
 296 that central obesity, as measured by the WH ratio, is a significant risk factor for HTN.

297 Body mass index (BMI) categories revealed significant differences (p < 0.001), with a greater  
 298 proportion of obesity being among the hypertensive group. Specifically, 53% of hypertensive  
 299 participants were Obese3 whereas 27% were in the normotensive group, highlighting a strong  
 300 association between obesity and HTN. Skinfold measurements, including tricep, bicep, subscapular, and  
 301 suprailiac values, showed little variation and no significant differences between groups, suggesting that  
 302 these anthropometric measures are not strongly associated with HTN in this population.

303 In summary, the data highlight significant associations between HTN and factors such as  
 304 employment status, age, salt intake, marital status, physical exercise, BMI, and WH ratio. These findings  
 305 emphasize the complex, multifactorial nature of HTN and the importance of comprehensive lifestyle  
 306 management in its prevention and control. Further research could explore causal relationships and the  
 307 impact of targeted interventions to address these risk factors effectively.

308 Table 1. Sociodemographic characteristics of study participants

| Characteristic      | N   | Overall, N = 453 | Normotensive, N = 300 | Hypertensive, N = 153 | p-value |
|---------------------|-----|------------------|-----------------------|-----------------------|---------|
| Sex                 | 453 |                  |                       |                       | 0.4     |
| F                   |     | 331 (73%)        | 203 (74%)             | 128 (71%)             |         |
| M                   |     | 122 (27%)        | 70 (26%)              | 52 (29%)              |         |
| Age                 | 453 | 40 (30, 55)      | 39 (31, 53)           | 41 (28, 56)           | 0.8     |
| Age Group           | 453 |                  |                       |                       | <0.001  |
| 18-25               |     | 45 (9.9%)        | 38 (14%)              | 7 (3.9%)              |         |
| 25-35               |     | 70 (15%)         | 64 (23%)              | 6 (3.3%)              |         |
| 35-45               |     | 113 (25%)        | 62 (23%)              | 51 (28%)              |         |
| >45                 |     | 225 (50%)        | 109 (40%)             | 116 (64%)             |         |
| Education           | 453 |                  |                       |                       | <0.001  |
| None or Primary     |     | 218 (48%)        | 130 (48%)             | 88 (49%)              |         |
| Secondary or Higher |     | 235 (52%)        | 143 (52%)             | 92 (51%)              |         |
| Employment          | 453 |                  |                       |                       | <0.001  |

|                |     |                   |                   |                   |        |
|----------------|-----|-------------------|-------------------|-------------------|--------|
| Employed       |     | 217 (48%)         | 138 (51%)         | 79 (44%)          |        |
| Unemployed     |     | 236 (52%)         | 135 (49%)         | 101 (56%)         |        |
| Marital Status | 453 |                   |                   |                   | <0.001 |
| Single         |     | 201 (44%)         | 126 (46%)         | 75 (42%)          |        |
| Married        |     | 96 (21%)          | 60 (22%)          | 36 (20%)          |        |
| Widowed        |     | 156 (34%)         | 87 (32%)          | 69 (38%)          |        |
| Salt           | 453 |                   |                   |                   | <0.001 |
| Low            |     | 129 (28%)         | 85 (31%)          | 44 (24%)          |        |
| Moderate       |     | 138 (30%)         | 99 (36%)          | 39 (22%)          |        |
| High           |     | 186 (41%)         | 89 (33%)          | 97 (54%)          |        |
| Smoke          | 453 | 235 (52%)         | 144 (61%)         | 91 (39%)          | 0.6    |
| Alcohol        | 453 | 229 (51%)         | 133 (58%)         | 96 (42%)          | 0.3    |
| Exercise       | 453 | 220 (49%)         | 147 (67%)         | 73 (33%)          | 0.006  |
| BMI Category   | 453 |                   |                   |                   | <0.001 |
| Normal         |     | 168 (37%)         | 143 (52%)         | 25 (14%)          |        |
| Overweight     |     | 1 (0.2%)          | 1 (0.4%)          | 0 (0%)            |        |
| Obese1         |     | 25 (5.5%)         | 9 (3.3%)          | 16 (8.9%)         |        |
| Obese2         |     | 90 (20%)          | 46 (17%)          | 44 (24%)          |        |
| Obese3         |     | 169 (37%)         | 74 (27%)          | 95 (53%)          |        |
| Tricep         | 453 | 10 (9.00, 11.00)  | 10 (9.00, 11.00)  | 11 (9.00, 11.00)  | 0.3    |
| Bicep          | 453 | 11 (10.00, 12.00) | 11 (10.00, 12.00) | 11 (9.00, 12.00)  | 0.3    |
| Subscapular    | 453 | 13 (11.00, 15.00) | 13 (11.00, 15.00) | 13 (11.00, 14.00) | 0.9    |
| Suprailiac     | 453 | 13 (11.00, 15.00) | 13 (11.00, 15.00) | 13 (12.00, 15.00) | 0.9    |
| WC             | 453 | 112 (100, 127)    | 113 (101, 127)    | 111 (99, 126)     | 0.5    |
| HC             | 453 | 110 (105, 115)    | 109 (105, 115)    | 110 (105, 115)    | 0.4    |
| WH Ratio       | 453 | 1.02 (0.91, 1.15) | 0.94 (0.88, 1.02) | 1.23 (1.14, 1.29) | <0.001 |

309

## 310 **Health related characteristics of study participants**

311 Table 2 provides a comparative analysis of several biochemical, lifestyle and health  
 312 characteristics between the normotensives and hypertensives among PLHIV. The prevalence of DM is  
 313 significantly higher in hypertensive individuals (66%), compared to normotensives (54%) with a p-value  
 314 of 0.009. This highlights the common co-occurrence of HTN and diabetes, likely due to shared risk  
 315 factors such as obesity and a sedentary lifestyle. In terms of glucose levels, there was no significant  
 316 difference between the groups ( $p = 0.3$ ), even though a slightly higher percentage of normotensive  
 317 individuals had high glucose levels (42%) compared to hypertensive individuals (35%). This suggests  
 318 that glucose levels alone do not significantly differentiate between hypertensive and normotensive states  
 319 in this sample.

320 It should be noted that hypertension and diabetes often occur in the same individuals, which is  
 321 most likely the result of excessive weight and physical inactivity. Comparing the groups in terms of  
 322 glucose levels showed no major differences ( $p = 0.3$ ), while the normotensive patients did display a  
 323 higher proportion of high glucose levels at (42%) in comparison to the hypertensive patients who had it

324 at (35%). It implies that glucose levels may not be the most effective indicators to distinguish between  
325 hypertensive and normotensive conditions in this group of patients.

326 In terms of HTN genetic factors there was a clear difference with 67% in hypertensive patients  
327 and 50% in normotensive patients having a family background for the condition ( $p < 0.001$ ). It illustrates  
328 the potential physiological mechanisms through which genetic predisposition is linked to the HTN  
329 condition and provides insight into exposure prevention strategies among polygenic families. There  
330 were no differences between the groups with respect to the levels of total cholesterol ( $p = 0.5$ ), which  
331 suggests that total cholesterol is not a significant differentiator of HTN in this sample. However, there  
332 was a significant difference in LDL cholesterol levels where significantly more individuals with  
333 normotension had high levels (47%) compared to individuals with hypertension (35%) with a p value of  
334 0.041. This result reveals that there may be other variables responsible.

335 High-Density Lipoprotein cholesterol levels did not show statistically significant differences  
336 between normotensive and hypertensive individuals ( $p = 0.7$ ) and the distribution of low, moderate and  
337 high HDL cholesterol was similar in both groups. This implies that HDL cholesterol might not be  
338 important in differentiating normotensive from hypertensive individuals. Non-HDL cholesterol levels  
339 were also found not to differ significantly between the groups ( $p = 0.2$ ), suggesting that higher levels of  
340 non-HDL cholesterol by itself is not significantly associated with hypertension on this sample. The  
341 triglyceride levels were similar for both groups while differences between groups were not significant ( $p$   
342  $= 0.4$ ) which also explains why triglycerides are not expected to play an important role in differentiating  
343 hypertensive status overall in this sample.

344 The estimated glomerular filtration rate (eGFR) values were also not significantly different in  
345 hypertensive individuals in comparison to normotensive individuals ( $p = 0.5$ ) suggesting that kidney  
346 function, as determined by eGFR, is roughly the same in both groups, though renal failure is prevalent in  
347 patients with HTN. The viral load status of subjects, designated as suppressed and unsuppressed or  
348 active, did not differ significantly between the normotensive and hypertensive populations either ( $p =$   
349  $0.4$ ). The fact that the viral load status is similar in both groups indicates that it is not an important  
350 determinant of hypertension in this population.

351 The distribution of antiretroviral therapy (ART) regimens was consistent between normotensive  
352 and hypertensive individuals, with no significant differences ( $p = 0.8$ ). This implies that the type of ART  
353 regimen does not significantly influence HTN status among participants. However, the duration on ART  
354 showed a significant difference ( $p < 0.001$ ), with a higher proportion of hypertensive individuals being

355 on ART for more than 15 years (64%) compared to normotensive individuals (23%). Conversely, a  
 356 larger proportion of normotensive individuals had been on ART for less than 5 years (58%) compared to  
 357 hypertensive individuals (8.3%), suggesting that longer duration on ART may be associated with an  
 358 increased prevalence of HTN, possibly due to chronic exposure to ART-related metabolic effects.

359 Knowledge about HTN was also significantly different between the groups ( $p = 0.014$ ), with a  
 360 higher proportion of normotensive individuals demonstrating HTN knowledge (57%) compared to  
 361 hypertensive individuals (45%). This suggests that increased awareness and knowledge about HTN may  
 362 be associated with better blood pressure control and lower prevalence of HTN. Overall, the analysis  
 363 highlights significant associations between HTN and factors such as diabetes mellitus, heredity, LDL  
 364 cholesterol levels, duration on ART, and knowledge about HTN, underscoring the complex interplay of  
 365 genetic, metabolic, and educational factors in the development and management of HTN.

366 Table 2. Health-related characteristics of study participants

| Characteristic      | N   | Overall, N = 453 | Normotensive, N = 300 | Hypertensive, N = 153 | P-value |
|---------------------|-----|------------------|-----------------------|-----------------------|---------|
| DM                  | 453 | 266 (59%)        | 147 (55%)             | 119 (45%)             | 0.009   |
| Glucose             | 453 |                  |                       |                       | 0.3     |
| Low                 |     | 152 (34%)        | 87 (32%)              | 65 (36%)              |         |
| Moderate            |     | 124 (27%)        | 72 (26%)              | 52 (29%)              |         |
| High                |     | 177 (39%)        | 114 (42%)             | 63 (35%)              |         |
| HTN Heredity        | 453 | 258 (57%)        | 137 (50%)             | 121 (67%)             | <0.001  |
| Total Cholesterol   | 453 |                  |                       |                       | 0.5     |
| Low                 |     | 152 (34%)        | 88 (32%)              | 64 (36%)              |         |
| Moderate            |     | 132 (29%)        | 85 (31%)              | 47 (26%)              |         |
| High                |     | 169 (37%)        | 100 (37%)             | 69 (38%)              |         |
| LDL Cholesterol     | 453 |                  |                       |                       | 0.041   |
| Low                 |     | 131 (29%)        | 70 (26%)              | 61 (34%)              |         |
| Moderate            |     | 132 (29%)        | 76 (28%)              | 56 (31%)              |         |
| High                |     | 190 (42%)        | 127 (47%)             | 63 (35%)              |         |
| HDL Cholesterol     | 453 |                  |                       |                       | 0.7     |
| Low                 |     | 138 (30%)        | 86 (32%)              | 52 (29%)              |         |
| Moderate            |     | 124 (27%)        | 76 (28%)              | 48 (27%)              |         |
| High                |     | 191 (42%)        | 111 (41%)             | 80 (44%)              |         |
| Non-HDL Cholesterol | 453 |                  |                       |                       | 0.2     |
| Low                 |     | 127 (28%)        | 81 (30%)              | 46 (26%)              |         |
| Moderate            |     | 146 (32%)        | 79 (29%)              | 67 (37%)              |         |
| High                |     | 180 (40%)        | 113 (41%)             | 67 (37%)              |         |
| Triglycerides       | 453 |                  |                       |                       | 0.4     |
| Low                 |     | 132 (29%)        | 86 (32%)              | 46 (26%)              |         |
| Moderate            |     | 142 (31%)        | 83 (30%)              | 59 (33%)              |         |
| High                |     | 179 (40%)        | 104 (38%)             | 75 (42%)              |         |
| eGFR                | 453 |                  |                       |                       | 0.5     |
| <60                 |     | 233 (51%)        | 144 (53%)             | 89 (49%)              |         |
| >60                 |     | 220 (49%)        | 129 (47%)             | 91 (51%)              |         |

|                 |     |           |           |           |        |
|-----------------|-----|-----------|-----------|-----------|--------|
| Viral Load      | 453 |           |           |           | 0.4    |
| Suppressed      |     | 217 (48%) | 126 (46%) | 91 (51%)  |        |
| Unsuppressed    |     | 236 (52%) | 147 (54%) | 89 (49%)  |        |
| ART             | 453 |           |           |           | 0.8    |
| 1S3E            |     | 104 (23%) | 64 (23%)  | 40 (22%)  |        |
| 1T3E            |     | 115 (25%) | 71 (26%)  | 44 (24%)  |        |
| 1T3N            |     | 139 (31%) | 85 (31%)  | 54 (30%)  |        |
| 1TFE            |     | 95 (21%)  | 53 (19%)  | 42 (23%)  |        |
| Duration On ART | 453 |           |           |           | <0.001 |
| <5              |     | 172 (38%) | 157 (58%) | 15 (8.3%) |        |
| 5-10            |     | 17 (3.8%) | 6 (2.2%)  | 11 (6.1%) |        |
| 10-15           |     | 85 (19%)  | 46 (17%)  | 39 (22%)  |        |
| >15             |     | 179 (40%) | 64 (23%)  | 115 (64%) |        |
| HTN Knowledge   | 453 | 236 (52%) | 155 (57%) | 81 (45%)  | 0.014  |

367

## 368 Data Partitioning

369 In ML, the exercise of dividing the dataset into ‘training’ and ‘testing’ sets is one of the primary  
 370 actions which help to assess the performance and generalization of the models. The Table 3 describes  
 371 the composition of two groups, hypertensive and normotensive, from the sample used for ML modeling.  
 372 The dataset consists of two components; the first part is referred to as the Training Set which is used  
 373 together with the data to train the ML models, and the test is the second part which is used for testing the  
 374 performance of trained models with data that is not seen before to the neural networks. This approach  
 375 avoids a situation where there is an overestimation of the performance of the models due to improper  
 376 techniques in practice.

377 Table 3. Distribution of hypertensive and normotensive participants in the ML modelling dataset.

| Category            | Training    | Testing    |
|---------------------|-------------|------------|
| <b>Hypertensive</b> | 144 (39.7%) | 36 (40.0%) |
| <b>Normotensive</b> | 219 (60.3%) | 54 (60.0%) |

378

379 The participants’ distribution in the training and testing subsets is as follows: for hypertensive  
 380 participants, the number was 144 (39.7 % of training set) and 36 (40.0 %) for test samples. For  
 381 normotensive, the number stood at 219 (60.3%) for test samples and 54 for (60.0 % of the training set).  
 382 It does so while ensuring that the distribution of the two sets of data across the set remains almost  
 383 constant; in other words, the training and testing sets are representative of the entire data sample used.

384 It is key for the performance of machine learning models to be evaluated over representative  
 385 samples so that they are built with a diverse range of categories for both the train and test sets in



386 consideration. Such a practice greatly minimizes bias in the results of the models and ensures that they  
387 are both trained on and validated through an adequate sample of data.

## 388 **Feature Importance and Correlation Analysis of HTN Predictors**

389 Figure 2A depicts a correlation and feature importance analysis graph affiliated with HTN  
390 Predictors. A closer view into the graph displays a rather distinct observation where the duration on  
391 ART seems to be the primary factor whereas other considerations greatly fall behind in relative  
392 importance ranking. This highlights the overdue influence that a sustained ART has on a patient where  
393 the healthy impacts are offset by long term metabolic impacts and the chances of developing chronic  
394 illnesses over time. Age group on the other hand comes in as a factor of equal importance as with age  
395 comes a plethora of chronic ailments. Increasing chances of suffering from hypertension or diabetes due  
396 to obesity also puts in body mass index as a significant modulatory factor.

397 A deep learning approach towards forecasting health outcomes treating body fat distribution  
398 metrics such as waist circumference and waist hip ratio as surrogate markers for central obesity has also  
399 proved to be quite efficient.

400 Salt intake, cardiovascular diseases, and genetics are on the important list in recognition of their  
401 association with high blood pressure or HTN. Other social determinants such as marital status, how  
402 regularly an opponent engages in physical activity, and how much low-density lipoproteins - LDL  
403 cholesterol - are in a person's blood are health determinants as well. As does the knowledge and  
404 education one has about hypertension, as this chronic disease can be managed or avoided. Factors that  
405 can affect the person in question include employment status, diabetes mellitus- DM, and the use of  
406 antiretroviral treatment- ART, but these factors have a smaller effect when compared to primary  
407 determinants.

408 The interrelations of the vast array of variables under study are graphically depicted in a  
409 correlation matrix of the output in Fig 2B, the correlation matrix shows the correlation between two  
410 variables. It is logical that age group and duration of ART are positively related, meaning that older  
411 people are living longer and being treated for chronic diseases, as expected, for example, cancer. It also  
412 shows that waist to hip ratio correlates with BMI but does not rat control nor obesity. Correlation  
413 between diabetes and HTN predisposes each other which is one of the moderate relations.

414 Education and employment status are positively correlated, highlighting the socioeconomic link  
415 between educational attainment and job opportunities, which can significantly affect health outcomes.  
416 Regular exercise shows a positive correlation with lower LDL cholesterol levels, emphasizing the  
417 cardiovascular benefits of physical activity. Additionally, the relationship between marital status and  
418 HTN knowledge suggests that marital status may influence health literacy and access to health  
419 information, potentially due to better social support systems among married individuals.

420 The strong correlations between waist circumference, waist-hip ratio, and BMI category further  
421 highlight the relatedness of different obesity metrics, emphasizing the importance of addressing obesity  
422 in health interventions. Glucose levels are positively correlated with diabetes mellitus status, as  
423 expected, given that elevated glucose is a diagnostic criterion for diabetes. Lastly, the correlation  
424 between ART usage and viral load underlines the role of ART in managing viral infections, likely in the  
425 context of HIV/AIDS, highlighting the importance of effective treatment adherence in achieving better  
426 health outcomes.

427

428 **Fig 2. Risk factors selection.** (A) Feature importance using Boruta, (B) Checking for  
429 multicollinearity among the selected features

430 In conclusion, these figures collectively emphasize the complex interplay between demographic,  
431 lifestyle, and clinical factors in determining health outcomes. The prominent roles of ART duration, age,  
432 BMI, and central obesity measures point to the need for comprehensive interventions targeting these  
433 areas to manage and prevent chronic diseases effectively. The correlations among these factors further  
434 illustrate the multifaceted nature of health determinants, underscoring the necessity of an integrated  
435 approach in healthcare management to address the intertwined influences of genetics, behaviour, and  
436 social determinants.

## 437 **Evaluating Machine Learning Models**

438 The ROC curves in Fig 3 A and B provide a comprehensive evaluation of various ML models  
439 used for binary classification tasks, specifically measuring their true positive rates against false positive  
440 rates across different thresholds. The AUC values for each model indicate the effectiveness of the  
441 models in distinguishing between the two classes.

442 In Fig 3A, the ROC curves for the models KNN, LR, NB, NN, RF, and XGBoost are depicted. The  
443 Random Forest model stands out with an AUC of one, indicating perfect discrimination and suggesting  
444 that it can classify positive and negative cases without any errors. This could imply overfitting, where  
445 the model may perform exceptionally well on the training data but might not generalize as effectively to  
446 unseen data. The XGBoost model also performs exceptionally well, with an AUC of 0.98, highlighting  
447 its robust capability in classifying the data accurately. The Neural Network model follows closely with  
448 an AUC of 0.96, highlighting its effectiveness in learning and generalizing from complex data patterns.

449 The K-NN, LR, and NB models show lower AUC values of 0.87, 0.83, and 0.82, respectively.  
450 These models, while performing adequately, are less effective compared to the tree-based and neural  
451 network models. Their ROC curves approach the 45-degree diagonal line more closely, indicating a  
452 higher rate of false positives and less efficient classification performance, especially in more complex  
453 scenarios where capturing intricate data relationships is crucial.

454 In the current section, Fig 3B shows the models being evaluated once again, this time around the  
455 performance metrics lie in close similarity to each other but with slight variance. The Extreme Gradient  
456 Boosting model secures a reliable AUC of 0.96 for class distinction and thus proves to be strong. The  
457 performance metrics of the NN model are still significantly high with an AUC of 0.90, which is slightly  
458 lower than what was achieved in Fig 3A. This shows that the classification metrics are still consistent  
459 but with slight degradation. The same phenomenon is observed in RF model as well as it has further  
460 dropped to 0.95 from previously achieving a perfect classification score. While still being effective, this  
461 change suggests that performance may vary dependent upon the data subsets used or configuration of  
462 the model.

463 The performance of Scenarios in which the Naive Bayes' model is placed in has improved as per  
464 the reading of section 3B which in turn has shifted the AUC value up to be 0.86. Such an increase is a  
465 sign of better classification than what was previously observed. Seeing a drop-off from AUC of 0.84 is  
466 the K-nearest neighbours model which does exhibit reasonable performance metrics, but they are  
467 outperforming by more advanced models. Even more at a disadvantage is the Naive Bayes model which  
468 has an AUC value of 0.76. The reason for this regression in performance is because the model can  
469 classify quite well due to the independent feature learning which could be obtained from complex  
470 datasets.

471

472 **Fig 3. Receiver Operating Characteristic Curves.** (A) Training set (B) Testing set

473 In conclusion, a comprehensive examination of Fig 3A and B provides a succinct summary of  
474 the merits and disadvantages of various ML models in single-valued classifications. Tree-based models  
475 such as Random Forest and Extreme Gradient Boosting continue to outrank others owing to their ability  
476 to account for non-linear relationships or interactions among the features. The Neural Network model  
477 also performs exceptionally well – showing little fluctuation over time due to its adaptability and  
478 learning from intricacies of multidimensional sets of data. Less complex models such as kNN, LR and  
479 NB, on the other hand, are relatively deficiently by way of complexity, and although they achieve  
480 moderate success, they are not as suited to intricacies in the data. This indicates that the model employed  
481 should be suitable for the data and the type of classification to be undertaken.

## 482 **Comparative Analysis of Machine Learning Models**

483 In Table 4, the results analysis is provided covering accuracy, precision, recall, F1-score, AUC  
484 visualizing a comparison across multiple models kNN, Logistic Regression LR, NB, NN, RF and  
485 XGBoost. Out of the evaluated models, Random Forest and XGBoost turn out to be the best. Random  
486 Forest had the overall best performance which had an accuracy of 91.1% along with high precision  
487 (91.1%) and strong recall (94.4%) asserting a good case on its classification and positive case prediction  
488 ability. In a similar fashion, XGBoost had the same metrics for precision and recall (88.9%) and had a  
489 great AUC of 96.0% showing good accuracy on distinguishing ability. However, unlike the rest of the  
490 models, Naive Bayes had a high precision of 97.2% but a low recall of 64.8% showcasing being good at  
491 getting the positives right but forgetting some instances. Logistic Regression and Neural Network also  
492 had good performance as LR had a decent precision of 80.4% and recall of 83.3% while NN had a good  
493 AUC of 89.9% with good overall metrics. The need to personalize choice of models abiding by the  
494 accuracy, precision, recall, and general context specific predictive power of different practical contexts  
495 is the takeaway from the observations.

496 Table 4. Comparative Analysis of ML Models

| <b>Model</b> | <b>Accuracy</b>         | <b>Precision</b> | <b>Recall</b> | <b>F1-score</b> | <b>AUC</b>              |
|--------------|-------------------------|------------------|---------------|-----------------|-------------------------|
| <b>kNN</b>   | 0.733 (0.630,<br>0.821) | 0.742            | 0.852         | 0.793           | 0.843 (0.765,<br>0.922) |
| <b>LR</b>    | 0.778 (0.678,<br>0.859) | 0.804            | 0.833         | 0.818           | 0.856 (0.779,<br>0.933) |
| <b>NB</b>    | 0.778 (0.678,           | 0.972            | 0.648         | 0.778           | 0.764 (0.660,           |

|            |                      |       |       |       |                      |
|------------|----------------------|-------|-------|-------|----------------------|
|            | 0.859)               |       |       |       | 0.868)               |
| <b>NN</b>  | 0.811 (0.715, 0.886) | 0.836 | 0.852 | 0.844 | 0.899 (0.835, 0.964) |
| <b>RF</b>  | 0.911 (0.832, 0.961) | 0.911 | 0.944 | 0.927 | 0.953 (0.912, 0.995) |
| <b>XGB</b> | 0.867 (0.779, 0.929) | 0.889 | 0.889 | 0.889 | 0.960 (0.926, 0.995) |

497

## 498 **Performance and Generalization, Testing for Overfitting**

499 Overfitting is one of the few phenomena that diminishes the performance of an ML-model. This  
500 is an aspect where a model learns the training dataset, and this then contributes towards the model's  
501 tendency to predict on new data [72]. To further investigate if our models were over fitting, we  
502 compared the training testing accuracies our models produced.

503 From the performance metrics analysed, the bar chart for Fig 4 ML models comparison is  
504 detailed for several ML models. The models that were evaluated include LR, NN, kNN, NB, RF and  
505 XGBoost. The metrics assessed are Training Accuracy, Testing Accuracy, Accuracy Difference,  
506 Misclassification and AUC.

507 It is clear from Fig 4 that Random Forest and XGBoost models achieves quite high training and  
508 testing accuracy, which shows the strength and efficiency of being able to deal with the dataset used.  
509 These models also have small accuracy difference for the cases of training and testing, which  
510 demonstrates that these models generalise well and are not over fitted. The AUC values for these models  
511 are also high which means that these models have good learning models.

512 On the other hand, the results obtained from the Naive Bayes model are not satisfactory, since it  
513 reports lower values in both training and testing accuracy while its misclassification rate is significantly  
514 higher. This may be due to its pronounced difficulties in dealing with the intricacies of the dataset or it is  
515 an under fitting problem. Overfitting problems are present in a Neural Network model which does not  
516 affect remarkably its accuracy metrics but generates a considerable accuracy gap still.

517 In terms of accuracy, KNN and Logistic Regression models perform moderately high however,  
518 they do not achieve the same effectiveness as the ensemble methods such as RF and XGBoost . Either  
519 the characteristics of the data or the capabilities of the model may account for this.

520

521 **Fig 4. Bar plot to test under and over fitting**

522 In conclusion, from the models developed in this analysis, RF and XGBoost are the best due to  
523 its comprehensive generalization and high performance. They score the highest among the models  
524 evaluated in terms of accuracy and generalisation performance. Nevertheless, XGBoost suffers from  
525 significant under fitting compared to RF so for this study XGBoost is the optimal choice.

526 **Discussion**

527 In this study, we investigated numerous ML algorithms to propose an explainable framework for  
528 predicting the risk of HTN in rural EC, South Africa. We trained six ML algorithms (NN, RF, LR, NB,  
529 kNN and XGBoost) to predict HTN, utilising risk factors of HTN among PLHIV. The performance of  
530 the established models matched by precision, accuracy, F1-score, recall, and ROC curve with AUC  
531 value on testing set. Considering the performance measurements, we concluded that XGBoost is the  
532 most appropriate candidate classifier for predicting HTN in this population. This selection tallies with  
533 the selection made by Chowdhury, Leung (73) in a study conducted in Canada where they proposed a  
534 system on 18,322 individuals with 24 candidate risk factors.

535 A healthcare campaign began in 2022 which focused on identifying advanced machine learning  
536 techniques to determine hypertension. Throughout this campaign Oanh and Tung (74) were able to  
537 create an ML model which has the capability to forecast hypertension risk in patients stationed at  
538 Vietnam. To keep the models more advanced, algorithms such as KNN, SVM, NB, voting and boosting  
539 were utilized to increase versatility. Other metrics which were used during model testing included the  
540 likes of precision, recall and F1-score. A similar approach was done by Islam and Talukdar (32) during  
541 the final parts of their research project across India, Nepal and Bangladesh as well, which consisted of  
542 over 818000 participants. They looked at seven risk factors for HTN and tested several algorithms,  
543 including gradient trees, random forests, gradient boosting machines, XGBoost , logistic regression, and  
544 linear discriminant analysis. Just like the current study, they also found that XGBoost performed the best  
545 among the tested methods.

546 In Malaysia, Chai and his team (70) utilised data from 2,461 participants to build a system for  
547 diagnosing HTN. They applied three types of algorithms: neural networks, traditional models like  
548 logistic regression and decision trees, and ensemble models including random forests and Light gradient

549 boosting machine (GBM). The models were evaluated for their ability to predict outcomes using metrics  
550 such as sensitivity, specificity, accuracy, and others, with LightGBM achieving the highest accuracy at  
551 74.39%.

552 Islam et.al (76) used national data from Bangladesh, which included 6,965 participants and 13  
553 risk factors for HTN. They then developed models using four ML algorithms and assessed their  
554 performance on a test dataset, using measures like accuracy, precision, recall, F1-score, and AUC. The  
555 gradient boosting model achieved the highest AUC score of 0.669.

556 Thus, the comparative results suggested that our proposed XGBoost framework could predict  
557 HTN with higher AUC. Moreover, Boruta analysis revealed that age group, duration on ART, BMI  
558 category, WH ratio, WC, HTN heredity, marital status, exercise, LDL cholesterol, knowledge of HTN,  
559 level of education, ART and DM were the important risk factors for developing HTN in the model.

560 A study by Belay and colleagues in 2022 (77), conducted in Ethiopia, revealed that individuals  
561 over 60 years old are twice as likely to develop HTN compared to those aged 18-40. This finding aligns  
562 with the conclusions of several other reviews and meta-analyses [78, 79]. The study highlights that  
563 aging is associated with changes in the arteries, particularly increasing stiffness in larger arteries, which  
564 contributes to the risk of HTN. Additionally, weight and body fat were identified as the second and third  
565 major factors driving HTN. Excess body weight, particularly visceral and retroperitoneal fat, plays a  
566 significant role in the development of HTN.

567 Another critical factor is BMI, which has been linked to HTN in earlier studies, including those  
568 by Hall et al. in 2019 (80). Body mass index may contribute to HTN and other cardiovascular issues by  
569 affecting the renin-angiotensin-aldosterone system and causing endothelial dysfunction, as noted by  
570 Imai in 2022 (81). Furthermore, high LDL was identified as a significant marker for HTN this supported  
571 the finding of a systematic review conducted by Obsa et.al (82). Additionally, other risk factors such as  
572 salt intake, alcohol consumption, and smoking were found to be important contributing risk factors of  
573 HTN, which is similar with other studies in literature [83, 84].

## 574 **Limitations**

575 Although this work has many strengths, it also has some limitations; the study did not measure  
576 the quantity of alcohol, cigarettes, and salts that were consumed. More data is required to validate the  
577 findings of the study.

## 578 **Conclusion**

579 This research delved into the incorporation of ML algorithms in predicting the incidence of  
580 hypertension among HIV infected patients receiving HAART in the healthcare of rural EC, South  
581 Africa. For building a useful and easy to understand framework for prediction, we trained and tested the  
582 models of six ML algorithms NN, RF, LR, NB, kNN, and XGBoost. According to our experiments, the  
583 XGBoost model produced the highest AUC score, and minimum overfitting compared to other models,  
584 thus the XGBoost model outperformed the other models. This suggested that XGBoost should be treated  
585 as the major classifier for HTN prediction in this situation. Our findings were consistent with previous  
586 studies supporting the fact that XGBoost as a reliable model for predictive analysis in an array of  
587 healthcare settings [73, 75, 70]. As highlighted by Boruta analysis, factors such as age group, duration  
588 on ART, BMI category, WH ratio, WC, presence of a HTN history in the family, marital status, physical  
589 activity, LDL cholesterol level, knowledge of HTN, level of education, ART treatment history, and  
590 diabetes incidence were identified as risk factors. All other factors improve the overall predictive  
591 accuracy of the model and illustrate the complexity of the risk factors for hypertension among PLHIV in  
592 rural settings of Eastern Cape, South Africa.

## 593 **Acknowledgments**

594 We express our sincere gratitude to the Walter Sisulu University Research Unit, and we also  
595 thank the staff of the participating CHCs and clinics for their assistance. Most of all, we thank the  
596 patients who participated in the study for their full co-operation and trust.

## 597 **Author Contributions**

598 **Conceptualization:** Urgent Tsuro, Trymore Ncube, Kelechi E. Oladimeji, Teke R. Apalata.

599 **Methodology:** Urgent Tsuro, Trymore Ncube.

600 **Investigation:** Urgent Tsuro.



601 **Data curation:** Urgent Tsuro.

602 **Software:** Urgent Tsuro.

603 **Visualization:** Urgent Tsuro.

604 **Formal analysis:** Urgent Tsuro.

605 **Validation:** Urgent Tsuro, Trymore Ncube.

606 **Writing original draft:** Urgent Tsuro.

607 **Writing review and editing** Urgent Tsuro, Trymore Ncube, Kelechi E. Oladimeji, Teke R. Apalata.

608 **Resources:** Teke R. Apalata.

609 **Supervision:** Teke R. Apalata, Kelechi E. Oladimeji.

## 610 **Funding**

611 This research was fully funded by the South African Medical Research Council under its  
612 Research Capacity Development Grant (MRC-RFA-CC 01-2014). The funders had no role in study  
613 design, data collection and analysis, decision to publish, or preparation of the manuscript.

614 Institutional Review Board Statement: Walter Sisulu University's Human Research Ethics and Biosafety  
615 Committee provided ethical approval (048/2019) and the Eastern Cape Department of Health  
616 (EC\_201907\_020) in accordance with the guidelines of the Declaration of Helsinki.

617 Informed Consent Statement: Consent forms were signed to obtain written informed consent for study  
618 participation. Personal identification information was removed from the data, and unique study codes  
619 were used to ensure participant anonymity.

620 Data Availability Statement Data will be made available upon request from the corresponding author.

## 621 **References**

- 622 1. Zhou B, Perel P, Mensah GA, Ezzati M. Global epidemiology, health burden and effective interventions  
623 for elevated blood pressure and hypertension. *Nat Rev Cardiol.* 2021;18(11):785-802. Epub 20210528. doi:  
624 10.1038/s41569-021-00559-8. PubMed PMID: 34050340; PubMed Central PMCID: PMCPMC8162166.
- 625 2. Sharma JR, Mabhida SE, Myers B, Apalata T, Nicol E, Benjeddou M, et al. Prevalence of Hypertension and  
626 Its Associated Risk Factors in a Rural Black Population of Mthatha Town, South Africa. *Int J Environ Res Public*

- 627 Health. 2021;18(3). Epub 20210129. doi: 10.3390/ijerph18031215. PubMed PMID: 33572921; PubMed Central  
628 PMCID: PMCPCMC7908535.
- 629 3. Onwukwe SC, Ngene NC. Blood pressure control in hypertensive patients attending a rural community  
630 health centre in Gauteng Province, South Africa: A cross-sectional study. *S Afr Fam Pract* (2004). 2022;64(1):e1-  
631 e9. Epub 20220328. doi: 10.4102/safp.v64i1.5403. PubMed PMID: 35384677; PubMed Central PMCID:  
632 PMCPCMC8991089.
- 633 4. Fuchs FD, Whelton PK. High Blood Pressure and Cardiovascular Disease. *Hypertension*. 2020;75(2):285-  
634 92. Epub 20191223. doi: 10.1161/hypertensionaha.119.14240. PubMed PMID: 31865786; PubMed Central  
635 PMCID: PMCPCMC10243231.
- 636 5. Schmidt BM, Durao S, Toews I, Bavuma CM, Hohlfeld A, Nury E, et al. Screening strategies for  
637 hypertension. *Cochrane Database Syst Rev*. 2020;5(5):Cd013212. Epub 20200507. doi:  
638 10.1002/14651858.CD013212.pub2. PubMed PMID: 32378196; PubMed Central PMCID: PMCPCMC7203601.
- 639 6. Harimenshi D, Niyongabo T, Preux PM, Aboyans V, Desormais I. Hypertension and associated factors in  
640 HIV-infected patients receiving antiretroviral treatment in Burundi: a cross-sectional study. *Sci Rep*.  
641 2022;12(1):20509. Epub 20221128. doi: 10.1038/s41598-022-24997-7. PubMed PMID: 36443478; PubMed  
642 Central PMCID: PMCPCMC9705296.
- 643 7. Blacher J, Kretz S, Sorbets E, Lelong H, Vallée A, Lopez-Sublet M. [Epidemiology of hypertension:  
644 Differences between women and men]. *Presse Med*. 2019;48(11 Pt 1):1240-3. Epub 20190528. doi:  
645 10.1016/j.lpm.2019.04.010. PubMed PMID: 31151845.
- 646 8. Li Z, Cao L, Zhou Z, Han M, Fu C. Factors influencing the progression from prehypertension to  
647 hypertension among Chinese middle-aged and older adults: a 2-year longitudinal study. *BMC Public Health*.  
648 2023;23(1):339. Epub 20230215. doi: 10.1186/s12889-022-14410-3. PubMed PMID: 36793011; PubMed Central  
649 PMCID: PMCPCMC9930240.
- 650 9. Madela S, Harriman NW, Sewpaul R, Mbewu AD, Williams DR, Sifunda S, et al. Individual and area-level  
651 socioeconomic correlates of hypertension prevalence, awareness, treatment, and control in uMgungundlovu,  
652 KwaZulu-Natal, South Africa. *BMC Public Health*. 2023;23(1):417. Epub 20230302. doi: 10.1186/s12889-023-  
653 15247-0. PubMed PMID: 36864433; PubMed Central PMCID: PMCPCMC9979474.
- 654 10. Kaczmarek M, Stawińska-Witoszyńska B, Krzyżaniak A, Krzywińska-Wiewiorowska M, Siwińska A. Who is  
655 at higher risk of hypertension? Socioeconomic status differences in blood pressure among Polish adolescents: a  
656 population-based ADOPOLNOR study. *Eur J Pediatr*. 2015;174(11):1461-73. Epub 20150509. doi:  
657 10.1007/s00431-015-2554-0. PubMed PMID: 25956273; PubMed Central PMCID: PMCPCMC4623093.
- 658 11. Ramezankhani A, Azizi F, Hadaegh F. Associations of marital status with diabetes, hypertension,  
659 cardiovascular disease and all-cause mortality: A long term follow-up study. *PLoS One*. 2019;14(4):e0215593.  
660 Epub 20190422. doi: 10.1371/journal.pone.0215593. PubMed PMID: 31009512; PubMed Central PMCID:  
661 PMCPCMC6476533.
- 662 12. Jaques DA, Wuerzner G, Ponte B. Sodium Intake as a Cardiovascular Risk Factor: A Narrative Review.  
663 *Nutrients*. 2021;13(9). Epub 20210912. doi: 10.3390/nu13093177. PubMed PMID: 34579054; PubMed Central  
664 PMCID: PMCPCMC8470268.
- 665 13. Gallucci G, Tartarone A, Lerosé R, Lalinga AV, Capobianco AM. Cardiovascular risk of smoking and  
666 benefits of smoking cessation. *J Thorac Dis*. 2020;12(7):3866-76. doi: 10.21037/jtd.2020.02.47. PubMed PMID:  
667 32802468; PubMed Central PMCID: PMCPCMC7399440.
- 668 14. Chiva-Blanch G, Badimon L. Benefits and Risks of Moderate Alcohol Consumption on Cardiovascular  
669 Disease: Current Findings and Controversies. *Nutrients*. 2019;12(1). Epub 20191230. doi: 10.3390/nu12010108.  
670 PubMed PMID: 31906033; PubMed Central PMCID: PMCPCMC7020057.

- 671 15. Dun Q, Xu W, Fu M, Wu N, Moore JB, Yu T, et al. Physical Activity, Obesity, and Hypertension among  
672 Adults in a Rapidly Urbanised City. *Int J Hypertens*. 2021;2021:9982562. Epub 20210811. doi:  
673 10.1155/2021/9982562. PubMed PMID: 34422409; PubMed Central PMCID: PMCPMC8376427.
- 674 16. Bai K, Chen X, Shi Z, He K, Hu X, Song R, et al. Hypertension modifies the associations of body mass index  
675 and waist circumference with all-cause mortality among older Chinese: a retrospective cohort study. *BMC*  
676 *Geriatr*. 2022;22(1):441. Epub 20220519. doi: 10.1186/s12877-022-03057-9. PubMed PMID: 35590286; PubMed  
677 Central PMCID: PMCPMC9118767.
- 678 17. Lee X, Gao Y, Zhang Y, Feng Y, Gao L, Wang A, et al. Comparison of 10 obesity-related indices for  
679 predicting hypertension based on ROC analysis in Chinese adults. *Front Public Health*. 2022;10:1042236. Epub  
680 20221125. doi: 10.3389/fpubh.2022.1042236. PubMed PMID: 36504986; PubMed Central PMCID:  
681 PMCPMC9732655.
- 682 18. Hezam AAM, Shaghdar HBM, Chen L. The connection between hypertension and diabetes and their role  
683 in heart and kidney disease development. *J Res Med Sci*. 2024;29:22. Epub 20240429. doi:  
684 10.4103/jrms.jrms\_470\_23. PubMed PMID: 38855561; PubMed Central PMCID: PMCPMC11162087.
- 685 19. Sinha S, Haque M. Insulin Resistance Is Cheerfully Hitched with Hypertension. *Life (Basel)*. 2022;12(4).  
686 Epub 20220410. doi: 10.3390/life12040564. PubMed PMID: 35455055; PubMed Central PMCID:  
687 PMCPMC9028820.
- 688 20. Kato AM, Kibone W, Okot J, Baruch Baluku J, Bongomin F. Self-Reported Hypertension and Associated  
689 Factors Among Adults in Butambala District, Central Uganda: A Community-Based Prevalence Study. *Integr*  
690 *Blood Press Control*. 2023;16:71-80. Epub 20231109. doi: 10.2147/ibpc.S434230. PubMed PMID: 37965566;  
691 PubMed Central PMCID: PMCPMC10642373.
- 692 21. Wang X, Feng Y, Yang L, Zhang G, Tian X, Ling Q, et al. Association of baseline serum cholesterol with  
693 benefits of intensive blood pressure control. *Chin Med J (Engl)*. 2023;136(17):2058-65. Epub 20230905. doi:  
694 10.1097/cm9.0000000000002474. PubMed PMID: 37525354; PubMed Central PMCID: PMCPMC10476779.
- 695 22. Park CH, Kim HW, Joo YS, Park JT, Chang TI, Yoo TH, et al. Findings from the KNOW-CKD Study indicate  
696 that higher systolic blood pressure time in target range is associated with a lower risk of chronic kidney disease  
697 progression. *Kidney Int*. 2024;105(4):835-43. Epub 20231228. doi: 10.1016/j.kint.2023.12.008. PubMed PMID:  
698 38159679.
- 699 23. Al-Shamsi S. Performance of the Framingham coronary heart disease risk score for predicting 10-year  
700 cardiac risk in adult United Arab Emirates nationals without diabetes: a retrospective cohort study. *BMC Fam*  
701 *Pract*. 2020;21(1):175. Epub 20200826. doi: 10.1186/s12875-020-01246-2. PubMed PMID: 32847496; PubMed  
702 Central PMCID: PMCPMC7450595.
- 703 24. Medina-Inojosa JR, Somers VK, Garcia M, Thomas RJ, Allison T, Chaudry R, et al. Performance of the  
704 ACC/AHA Pooled Cohort Cardiovascular Risk Equations in Clinical Practice. *J Am Coll Cardiol*. 2023;82(15):1499-  
705 508. doi: 10.1016/j.jacc.2023.07.018. PubMed PMID: 37793746.
- 706 25. Paulus JK, Kent DM. Predictably unequal: understanding and addressing concerns that algorithmic  
707 clinical prediction may increase health disparities. *NPJ Digit Med*. 2020;3:99. Epub 20200730. doi:  
708 10.1038/s41746-020-0304-9. PubMed PMID: 32821854; PubMed Central PMCID: PMCPMC7393367.
- 709 26. Subramani S, Varshney N, Anand MV, Soudagar MEM, Al-Keridis LA, Upadhyay TK, et al. Cardiovascular  
710 diseases prediction by machine learning incorporation with deep learning. *Front Med (Lausanne)*.  
711 2023;10:1150933. Epub 20230417. doi: 10.3389/fmed.2023.1150933. PubMed PMID: 37138750; PubMed  
712 Central PMCID: PMCPMC10150633.

- 713 27. Sarker IH. Machine Learning: Algorithms, Real-World Applications and Research Directions. *SN Comput*  
714 *Sci.* 2021;2(3):160. Epub 20210322. doi: 10.1007/s42979-021-00592-x. PubMed PMID: 33778771; PubMed  
715 Central PMCID: PMCPMC7983091.
- 716 28. Zawadzki RS, Grill JD, Gillen DL. Frameworks for estimating causal effects in observational settings:  
717 comparing confounder adjustment and instrumental variables. *BMC Med Res Methodol.* 2023;23(1):122. Epub  
718 20230522. doi: 10.1186/s12874-023-01936-2. PubMed PMID: 37217854; PubMed Central PMCID:  
719 PMCPMC10201752.
- 720 29. Bi Q, Goodman KE, Kaminsky J, Lessler J. What is Machine Learning? A Primer for the Epidemiologist. *Am*  
721 *J Epidemiol.* 2019;188(12):2222-39. doi: 10.1093/aje/kwz189. PubMed PMID: 31509183.
- 722 30. Ramsdale E, Snyder E, Culakova E, Xu H, Dziorny A, Yang S, et al. An introduction to machine learning for  
723 clinicians: How can machine learning augment knowledge in geriatric oncology? *J Geriatr Oncol.*  
724 2021;12(8):1159-63. Epub 20210329. doi: 10.1016/j.jgo.2021.03.012. PubMed PMID: 33795205; PubMed  
725 Central PMCID: PMCPMC8478967.
- 726 31. Nazar W, Szymanowicz S, Nazar K, Kaufmann D, Wabich E, Braun-Dullaes R, et al. Artificial intelligence  
727 models in prediction of response to cardiac resynchronization therapy: a systematic review. *Heart Fail Rev.*  
728 2024;29(1):133-50. Epub 20231020. doi: 10.1007/s10741-023-10357-8. PubMed PMID: 37861853; PubMed  
729 Central PMCID: PMCPMC10904439.
- 730 32. Islam SMS, Talukder A, Awal MA, Siddiqui MMU, Ahamad MM, Ahammed B, et al. Machine Learning  
731 Approaches for Predicting Hypertension and Its Associated Factors Using Population-Level Data From Three  
732 South Asian Countries. *Front Cardiovasc Med.* 2022;9:839379. Epub 20220331. doi: 10.3389/fcvm.2022.839379.  
733 PubMed PMID: 35433854; PubMed Central PMCID: PMCPMC9008259.
- 734 33. Haugg F, Elgendi M, Menon C. Assessment of Blood Pressure Using Only a Smartphone and Machine  
735 Learning Techniques: A Systematic Review. *Front Cardiovasc Med.* 2022;9:894224. Epub 20220613. doi:  
736 10.3389/fcvm.2022.894224. PubMed PMID: 35770219; PubMed Central PMCID: PMCPMC9234172.
- 737 34. Nour M, Polat K. Automatic Classification of Hypertension Types Based on Personal Features by Machine  
738 Learning Algorithms. *Mathematical Problems in Engineering.* 2020;2020:1-13. doi: 10.1155/2020/2742781.
- 739 35. Boutilier JJ, Chan TCY, Ranjan M, Deo S. Risk Stratification for Early Detection of Diabetes and  
740 Hypertension in Resource-Limited Settings: Machine Learning Analysis. *J Med Internet Res.* 2021;23(1):e20123.  
741 Epub 20210121. doi: 10.2196/20123. PubMed PMID: 33475518; PubMed Central PMCID: PMCPMC7862003.
- 742 36. El-Sherbini AH, Hassan Virk HU, Wang Z, Glicksberg BS, Krittanawong C. Machine-Learning-Based  
743 Prediction Modelling in Primary Care: State-of-the-Art Review. *AI.* 2023;4(2):437-60. PubMed PMID:  
744 doi:10.3390/ai4020024.
- 745 37. Association GAotWM. World Medical Association Declaration of Helsinki: ethical principles for medical  
746 research involving human subjects. *J Am Coll Dent.* 2014;81(3):14-8. PubMed PMID: 25951678.
- 747 38. Patel D, Johnson CH, Krueger A, Maciak B, Belcher L, Harris N, et al. Trends in HIV testing among US  
748 adults, aged 18–64 years, 2011–2017. *AIDS and behavior.* 2020;24:532-9.
- 749 39. Zhou H, Xin Y, Li S. A diabetes prediction model based on Boruta feature selection and ensemble  
750 learning. *BMC bioinformatics.* 2023;24(1):224.
- 751 40. Wu S, Chen Y, Li Z, Li J, Zhao F, Su X. Towards multi-label classification: Next step of machine learning for  
752 microbiome research. *Computational and Structural Biotechnology Journal.* 2021;19:2742-9.
- 753 41. ZAIDI A. Mathematical justification on the origin of the sigmoid in logistic regression. *Central European*  
754 *Management Journal.* 2022;30(4):1327-37.

- 755 42. Cornejo-Bueno L, Pérez-Aracil J, Casanova-Mateo C, Sanz-Justo J, Salcedo-Sanz S. Machine learning  
756 classification–regression schemes for desert locust presence prediction in western Africa. *Applied Sciences*.  
757 2023;13(14):8266.
- 758 43. Nguyen PT, Ha DH, Avand M, Jaafari A, Nguyen HD, Al-Ansari N, et al. Soft computing ensemble models  
759 based on logistic regression for groundwater potential mapping. *Applied Sciences*. 2020;10(7):2469.
- 760 44. Islam MM, Alam MJ, Maniruzzaman M, Ahmed N, Ali MS, Rahman MJ, et al. Predicting the risk of  
761 hypertension using machine learning algorithms: A cross sectional study in Ethiopia. *PLoS One*.  
762 2023;18(8):e0289613. Epub 20230824. doi: 10.1371/journal.pone.0289613. PubMed PMID: 37616271; PubMed  
763 Central PMCID: PMCPCMC10449142.
- 764 45. Tanjung JP, Tampubolon FC, Panggabean AW, Nandrawan MAA. Customer Classification Using Naive  
765 Bayes Classifier With Genetic Algorithm Feature Selection. *Sinkron: jurnal dan penelitian teknik informatika*.  
766 2023;7(1):584-9.
- 767 46. Hidayat R, Huda M, Pradita N. Comparison Of The C4. 5 And Naïve Bayes Algorithm For  
768 Recommendations For Aid Recipients For The Smart Indonesian Program. *Kesatria: Jurnal Penerapan Sistem  
769 Informasi (Komputer dan Manajemen)*. 2024;5(1):345-58.
- 770 47. Abo MEM, Idris N, Mahmud R, Qazi A, Hashem IAT, Maitama JZ, et al. A multi-criteria approach for  
771 arabic dialect sentiment analysis for online reviews: Exploiting optimal machine learning algorithm selection.  
772 *Sustainability*. 2021;13(18):10018.
- 773 48. Religia Y, Maulana D. Genetic Algorithm Optimization on Nave Bayes for Airline Customer Satisfaction  
774 Classification. *JISA (Jurnal Informatika dan Sains)*. 2021;4(2):121-6.
- 775 49. Kuriyozov E, Matlatipov S, Alonso MA, Gómez-Rodríguez C. Deep learning vs. classic models on a new  
776 Uzbek sentiment analysis dataset. *Human Language Technologies as a Challenge for Computer Science and  
777 Linguistics*. 2019:258-62.
- 778 50. Karthika R, Maheswari M. Detection analysis of malicious cyber attacks using machine learning  
779 algorithms. *Materials Today: Proceedings*. 2022;68:26-34.
- 780 51. Boateng EY, Otoo J, Abaye DA. Basic tenets of classification algorithms K-nearest-neighbor, support  
781 vector machine, random forest and neural network: A review. *Journal of Data Analysis and Information  
782 Processing*. 2020;8(4):341-57.
- 783 52. El Morr C, Jammal M, Ali-Hassan H, El-Hallak W. Overview of machine learning algorithms. *Machine  
784 Learning for Practical Decision Making: A Multidisciplinary Perspective with Applications from Healthcare,  
785 Engineering and Business Analytics*: Springer; 2022. p. 61-115.
- 786 53. Kang S. K-nearest neighbor learning with graph neural networks. *Mathematics*. 2021;9(8):830.
- 787 54. Chen T, Guestrin C, editors. Xgboost: A scalable tree boosting system. *Proceedings of the 22nd acm  
788 sigkdd international conference on knowledge discovery and data mining*; 2016.
- 789 55. Sagi O, Rokach L. Explainable decision forest: Transforming a decision forest into an interpretable tree.  
790 *Information Fusion*. 2020;61:124-38.
- 791 56. Osman AF, Maalej NM. Applications of machine and deep learning to patient-specific IMRT/VMAT  
792 quality assurance. *Journal of Applied Clinical Medical Physics*. 2021;22(9):20-36.
- 793 57. González S, García S, Del Ser J, Rokach L, Herrera F. A practical tutorial on bagging and boosting based  
794 ensembles for machine learning: Algorithms, software tools, performance study, practical perspectives and  
795 opportunities. *Information Fusion*. 2020;64:205-37.
- 796 58. Mienye ID, Sun Y. A survey of ensemble learning: Concepts, algorithms, applications, and prospects. *IEEE  
797 Access*. 2022;10:99129-49.

- 798 59. Talaei Khoei T, Kaabouch N. Machine Learning: Models, Challenges, and Research Directions. *Future*  
799 *Internet*. 2023;15(10):332.
- 800 60. Jain N, Jana PK. LRF: A logically randomized forest algorithm for classification and regression problems.  
801 *Expert Systems with Applications*. 2023;213:119225.
- 802 61. Zhang J, Li C, Yin Y, Zhang J, Grzegorzec M. Applications of artificial neural networks in microorganism  
803 image analysis: a comprehensive review from conventional multilayer perceptron to popular convolutional  
804 neural network and potential visual transformer. *Artificial Intelligence Review*. 2023;56(2):1013-70.
- 805 62. Soni B, Mathur P, Bora A. In depth analysis, applications and future issues of artificial neural network.  
806 *Enabling AI applications in data science*. 2021:149-83.
- 807 63. Song Y. Predictive coding inspires effective alternatives to backpropagation: University of Oxford; 2021.
- 808 64. Erickson BJ, Kitamura F. Magician's corner: 9. Performance metrics for machine learning models.  
809 *Radiological Society of North America*; 2021. p. e200126.
- 810 65. Kucirka LM, Lauer SA, Laeyendecker O, Boon D, Lessler J. Variation in false-negative rate of reverse  
811 transcriptase polymerase chain reaction-based SARS-CoV-2 tests by time since exposure. *Annals of internal*  
812 *medicine*. 2020;173(4):262-7.
- 813 66. Hicks SA, Strümke I, Thambawita V, Hammou M, Riegler MA, Halvorsen P, et al. On evaluation metrics  
814 for medical applications of artificial intelligence. *Scientific reports*. 2022;12(1):5979.
- 815 67. Powers DM. Evaluation: from precision, recall and F-measure to ROC, informedness, markedness and  
816 correlation. *arXiv preprint arXiv:201016061*. 2020.
- 817 68. Yacouby R, Axman D, editors. Probabilistic extension of precision, recall, and f1 score for more thorough  
818 evaluation of classification models. *Proceedings of the first workshop on evaluation and comparison of NLP*  
819 *systems*; 2020.
- 820 69. Jiao Y, Du P. Performance measures in evaluating machine learning based bioinformatics predictors for  
821 classifications. *Quantitative Biology*. 2016;4:320-30.
- 822 70. Chai SS, Goh KL, Cheah WL, Chang YHR, Ng GW. Hypertension prediction in adolescents using  
823 anthropometric measurements: do machine learning models perform equally well? *Applied Sciences*.  
824 2022;12(3):1600.
- 825 71. Gygi JP, Kleinstein SH, Guan L. Predictive overfitting in immunological applications: Pitfalls and solutions.  
826 *Hum Vaccin Immunother*. 2023;19(2):2251830. doi: 10.1080/21645515.2023.2251830. PubMed PMID:  
827 37697867; PubMed Central PMCID: PMCPMC10498807.
- 828 72. Xu C, Coen-Pirani P, Jiang X. Empirical Study of Overfitting in Deep Learning for Predicting Breast Cancer  
829 Metastasis. *Cancers (Basel)*. 2023;15(7). Epub 20230325. doi: 10.3390/cancers15071969. PubMed PMID:  
830 37046630; PubMed Central PMCID: PMCPMC10093528.
- 831 73. Chowdhury MZI, Leung AA, Walker RL, Sikdar KC, O'Beirne M, Quan H, et al. A comparison of machine  
832 learning algorithms and traditional regression-based statistical modeling for predicting hypertension incidence in  
833 a Canadian population. *Sci Rep*. 2023;13(1):13. Epub 20230102. doi: 10.1038/s41598-022-27264-x. PubMed  
834 PMID: 36593280; PubMed Central PMCID: PMCPMC9807553.
- 835 74. Oanh TT, Tung NT. Predicting hypertension based on machine learning methods: A case study in  
836 northwest vietnam. *Mobile Networks and Applications*. 2022;27(5):2013-23.
- 837 75. Islam SMS, Talukder A, Awal MA, Siddiqui MMU, Ahamad MM, Ahammed B, et al. Machine learning  
838 approaches for predicting hypertension and its associated factors using population-level data from three South  
839 Asian countries. *Frontiers in Cardiovascular Medicine*. 2022;9:839379.

- 840 76. Islam MM, Rahman MJ, Roy DC, Tawabunnahar M, Jahan R, Ahmed NF, et al. Machine learning  
841 algorithm for characterizing risks of hypertension, at an early stage in Bangladesh. *Diabetes & Metabolic*  
842 *Syndrome: Clinical Research & Reviews*. 2021;15(3):877-84.
- 843 77. Belay DG, Fekadu Wolde H, Molla MD, Aragie H, Adugna DG, Melese EB, et al. Prevalence and associated  
844 factors of hypertension among adult patients attending the outpatient department at the primary hospitals of  
845 Wolkait tegedie zone, Northwest Ethiopia. *Frontiers in Neurology*. 2022;13:943595.
- 846 78. Legese N, Tadiwos Y. Epidemiology of hypertension in Ethiopia: a systematic review. *Integrated blood*  
847 *pressure control*. 2020:135-43.
- 848 79. Koya SF, Pilakkadavath Z, Chandran P, Wilson T, Kuriakose S, Akbar SK, et al. Hypertension control rate in  
849 India: systematic review and meta-analysis of population-level non-interventional studies, 2001–2022. *The*  
850 *Lancet Regional Health-Southeast Asia*. 2023;9.
- 851 80. Hall JE, do Carmo JM, da Silva AA, Wang Z, Hall ME. Obesity, kidney dysfunction and hypertension:  
852 mechanistic links. *Nature reviews nephrology*. 2019;15(6):367-85.
- 853 81. Imai Y. A personal history of research on hypertension From an encounter with hypertension to the  
854 development of hypertension practice based on out-of-clinic blood pressure measurements. *Hypertension*  
855 *Research*. 2022;45(11):1726-42.
- 856 82. Obsa MS, Ataro G, Awoke N, Jemal B, Tilahun T, Ayalew N, et al. Determinants of Dyslipidemia in Africa:  
857 A Systematic Review and Meta-Analysis. *Front Cardiovasc Med*. 2021;8:778891. Epub 20220223. doi:  
858 10.3389/fcvm.2021.778891. PubMed PMID: 35284497; PubMed Central PMCID: PMC8904727.
- 859 83. Nguyen TT, Nguyen MH, Nguyen YH, Nguyen TT, Giap MH, Tran TD, et al. Body mass index, body fat  
860 percentage, and visceral fat as mediators in the association between health literacy and hypertension among  
861 residents living in rural and suburban areas. *Frontiers in Medicine*. 2022;9:877013.
- 862 84. Choi JW, Han E, Kim TH. Risk of hypertension and type 2 diabetes in relation to changes in alcohol  
863 consumption: a nationwide cohort study. *International journal of environmental research and public health*.  
864 2022;19(9):4941.
- 865

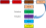



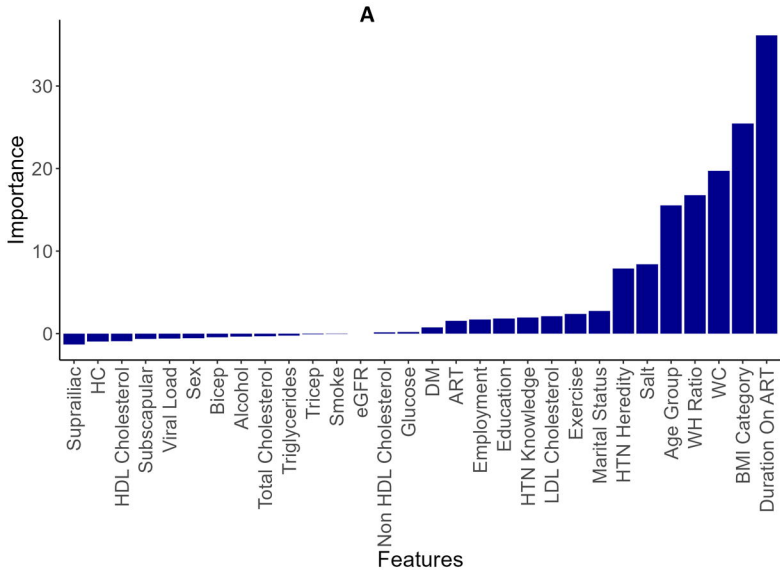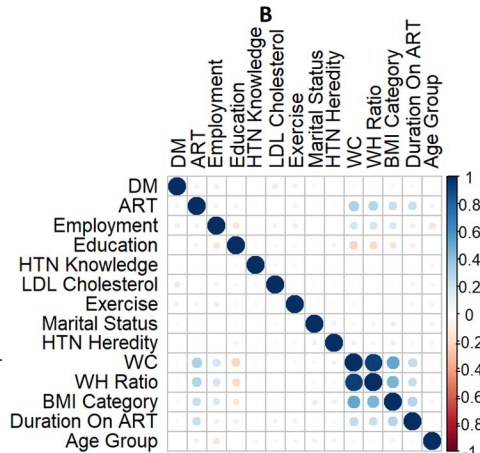

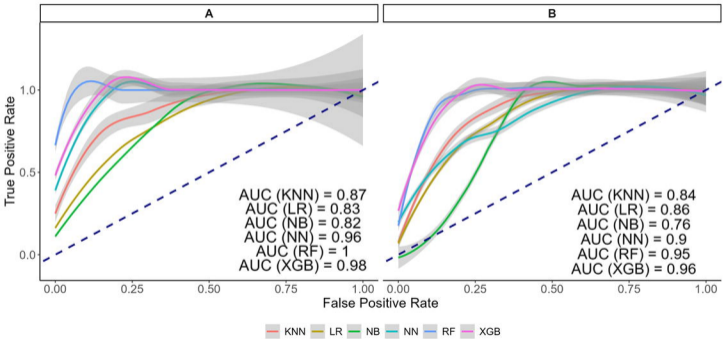

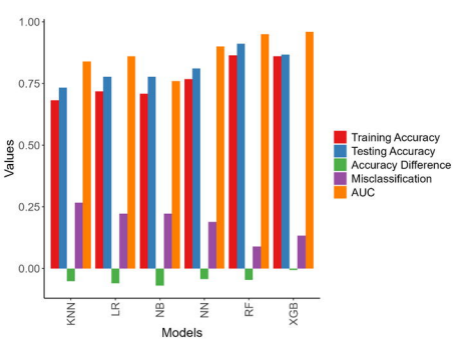

Source: https://medrxiv.org/content/medrxiv/early/2025/01/12/2025.01.11.25320377.full.pdf
